# Supplementary material
Source: Elsevier journal article supplement (https://www.sciencedirect.com/science/article/pii/S0121812317301214)
Supplement: mmc1 [file S0121812317301214:mmc1.docx]

| Tabla complementaria 1. Características y resultado materno-fetal de los embarazos asociados con gota | | | | | | | | | | | | | | |
| --- | --- | --- | --- | --- | --- | --- | --- | --- | --- | --- | --- | --- | --- | --- |
| Autor | NE | Hb | SUA | SCr | BUN | CrCl | Artritis gotosa durante el embarazo | Tratamiento de la artritis en el embarazo | Complicaciones materna | Tratamiento durante el embarazo | Desenlace del embarazo | Recién nacido | Artritis gotosa en el posparto | Tratamiento de la gota en el posparto |
| Greenhut et al[7](#_ENREF_7) | 2 | NR | NR | NR | NR | NR | No | - | Preeclampsia | Ninguno | Parto | Sano | Si | NR |
| Mace[5](#_ENREF_5) | 1 | NR | NR | NR | NR | NR | No | - | Ninguna | Ninguno | Parto | Sano | Si, 11 meses | NR |
| Weingold[8](#_ENREF_8" \o "Weingold, 1960 #14) and Batt[17](#_ENREF_17" \o "Batt, 1963 #28) | 3 | NR | NR | NR | NR | NR | No | - | Ninguna | Ninguno | Aborto en el 2° mes. | Aborto | No | - |
| 4 | NR | NR | NR | NR | NR | No | - | Ninguna | Ninguno | Parto, prematuro | Falleció a las 15 horas | No | - |
| 5 | NR | NR | NR | NR | NR | No | - | Ninguna | Ninguno | Parto | Sano | Si, 3 meses | NR |
| 6 | 9.7-10.3 | 6.5 | NR | 32 | NR | No | - | Anemia | Colchicina, probenecid | Parto | Falleció en el 4 día | Si, 2 días | NR |
| 7 | 9 | 9.5-10.5 | 2.1 | 27 | NR | No | - | Anemia, insuficiencia renal, pielonefritis | Colchicina y probenecid en el 1 trimestre, luego PRN | Parto | Sano | Sí, 18 horas | NR |
| 8 | NR | NR | NR | NR | NR | 1 semana previo al parto | Prednisona | Preeclampsia, Insuficiencia renal, uremia posparto | Colchicina y probenecid | Parto | Sano | Si, 6 meses | Colchicina y probenecid |
| 9 | NR | NR | NR | NR | NR | No | - | Herpes zoster | Colchicina y probenecid | Aborto en el 5 mes | Aborto | No | - |
| 10 | 7.4-9.8 | 11.2 | 2.3 | 49 | 17-24 | No | - | Insuficiencia renal, anemia, preeclampsia, uremia posparto, nefropatía perdedora de sal | Probenecid 0.5 mg 3 veces al día. Al final del embarazo colchicina 0.5 mg 3 veces al día | Parto | Sano | No | Colchicina y probenecid |
| Friedman and Little[10](#_ENREF_10) | 3 | NR | NR | NR | NR | NR | No | - | NR | - | Aborto | Aborto | No | - |
| 4 | NR | NR | NR | NR | NR | No | - | NR | - | Aborto | Aborto | No | - |
| 5 | 13.9 | 8.3 | NR | 61.6 | NR | No | - | Insuficiencia renal, preeclampsia, uremia posparto | Ninguno | Parto, pretérmino | Sano | Sí | NR |
| 6 | NR | 7.7 | NR | 12 | ND | Si, 8 SDG | NR | Insuficiencia renal | NR | Histerectomía a las 11 SDG | Aborto | Sí | Colchicina |
| Lee and Loffler[12](#_ENREF_12" \o "Lee, 1962 #22) | 5 | NR | 07.5-15 | NR | NR | 28 | Si | Colchicina, aspirina | Insuficiencia renal, anemia | Probenecid 1.5 g/día | Parto | Sano | No | Probenecid 1.5 g/día |
| 6 | NR | 6.8-10.7 | NR | 96 | 28 | No | - | Insuficiencia renal, anemia,  Hemorragia uterina, uremia posparto. | Probenecid 1-3 g/día | Falla en la inducción de parto, Cesárea a las 37 SDG | Sano | Sí, 25 días | Probenecid 2 g/día. Colchicina |
| Coddington et al[19](#_ENREF_19). | 2 | 9.3 | NR | 2 | 35 | 35 | No | - | Insuficiencia renal, anemia. Ruptura prematura de membranas | Alopurinol 300 mg/día | Parto, pretérmino | Sano | No | Alopurinol 300 mg/día |
| Kelsall and O´Hanlon[20](#_ENREF_20" \o "Kelsall, 1994 #34) | 2 | NR | 9.27 | 1.7 | NR | 63 | Si, 13 SDG | Indometacina | Insuficiencia renal | Ninguno | Aborto a las 13 SDG | Sano | No | - |
| Lhotta et al[6](#_ENREF_6). | 1 | 9.6 | 12 | 1.5 | NR | 40 | No | - | Insuficiencia renal.  Hemorragia posparto | Alopurinol en el 1 trimestre | Parto | Sano | No | - |
| Metyas et al[4](#_ENREF_4). | 1 | NR | NR | NR | NR | NR | Si, 8 SDG | Infiltración de GC intrarticular. PDN 20 mg/d con reducción | Insuficiencia renal | Colchicina 0.6 mg 2 veces al día en el último trimestre | Parto | Sano | No | Colchicina 0.6 mg 2 veces al día y alopurinol 300 mg/día |
| Hassan and Gendi[9](#_ENREF_9" \o "Hassan, 2010 #15) | 1 | NR | 9.26 | NR | NR | NR | Si , 7 SDG | MPS | Ninguna | MPS intramuscular | NR | NR | NR | NR |
| Van Veen et al[30](#_ENREF_30). | 1 | NR | NR | 0.58 | NR | NR | Si, 34 SDG | Hidrocodona y alopurinol | Diabetes gestacional | Hidrocodona y alopurinol | Parto | Sano | No | NR |
| Caso actual | 1 | 9.6-10.9 | 9.1 | 1.18 | 19 | 50.64 | SI, 13 SDG | Infiltración de GC intrarticular.  MPS  Ibuprofeno | Insuficiencia renal, anemia, dislipidemia | Alopurinol (1 trimestre)  Colchicina1mg/día, prednisona 5-10 mg/día | Cesárea | Sano | Sí, 24 horas | Ketorolaco  Prednisona |
| Abreviaturas: NE: Número de embarazos. Hb: Hemoglobina. SUA ácido úrico sérico SCr: creatinina sérica. CrCl: Depuración de creatinina. BUN: nitrógeno ureico en sangre. SDG: semanas de gestación. ARA: American Rheumatism Association. NR: No reportado. MPS: metilprednisolona. GC: glucocorticoides | | | | | | | | | | | | | | |
